# Supplementary material for: Enrichment of Nutmeg Essential Oil from Oil-in-Water Emulsions with PAN-Based Membranes
Source: MDPI journal article supplement (doi:10.3390/membranes14050097), 2024-04-25
Supplement: s1 [file s1]

## Supplementary material

### Enrichment of Nutmeg Essential Oil from Oil-in-Water

#### Emulsions with PAN-Based Membranes

Huilan Yin <sup>1</sup>, Haoyu Zhang <sup>1</sup>, Jiaoyang Cui <sup>1</sup>, Qianlian Wu <sup>1</sup>, Linlin Huang <sup>1</sup>,  
Jiaoyue Qiu <sup>1</sup>, Xin Zhang <sup>1</sup>, Yanyu Xiang <sup>1</sup>, Bo Li <sup>1,2</sup>, Hongbo Liu <sup>3</sup>, Zhishu Tang <sup>3</sup>,  
Yue Zhang <sup>1,\*</sup> and Huaxu Zhu <sup>1,\*</sup>

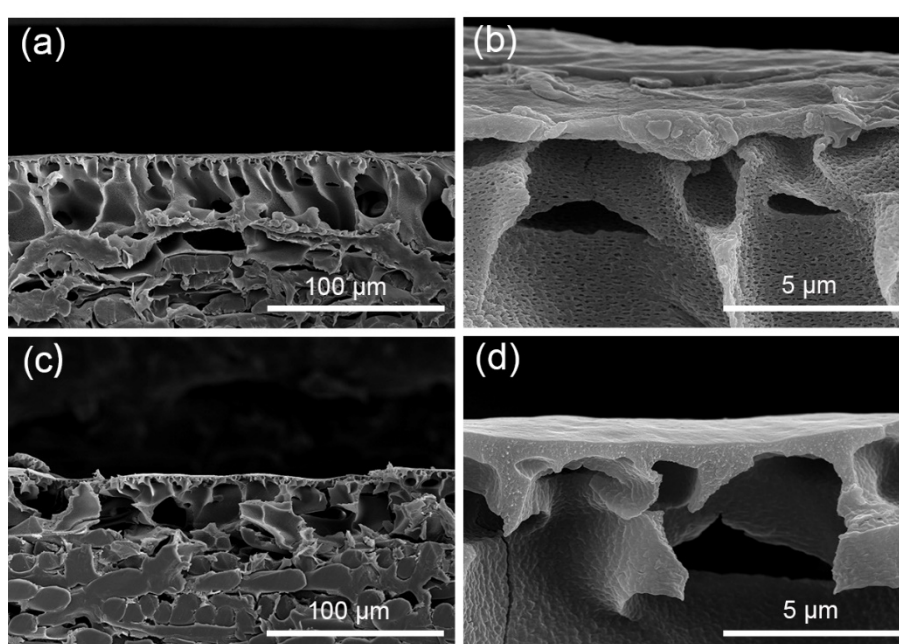

**Figure S1.** The SEM cross sections of (a, b) PAN and (c, d) H-PAN membranes.

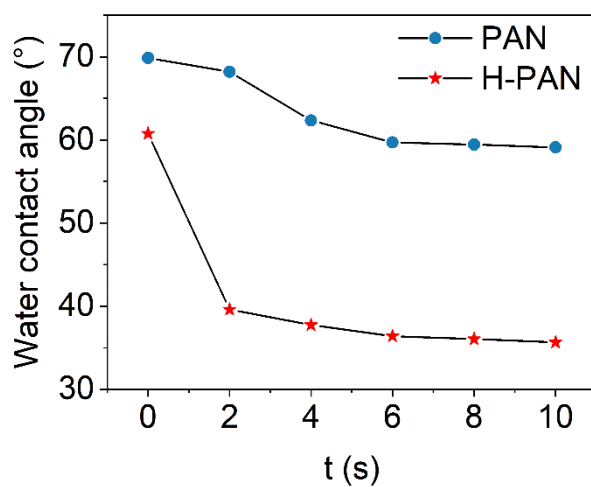

**Figure S2.** Dynamic water contact angle of PAN and H-PAN membranes.

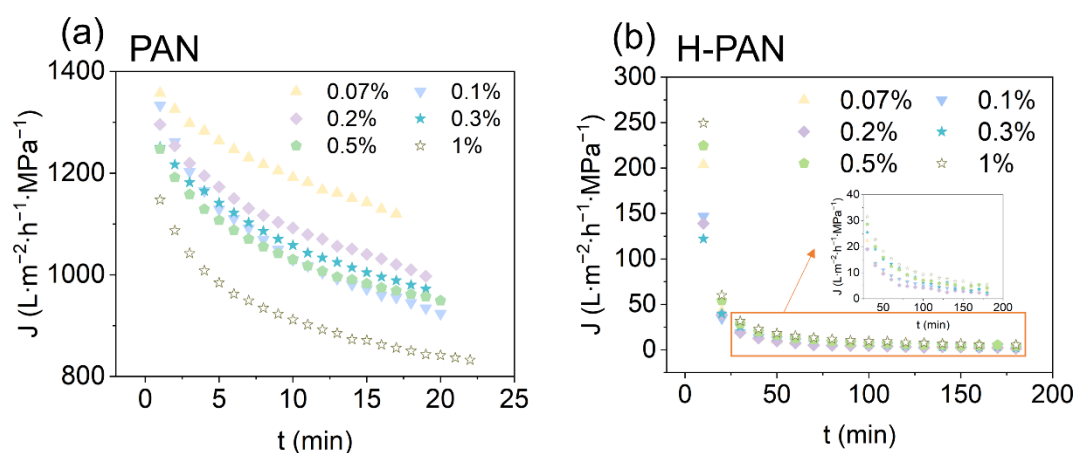

**Figure S3.** The permeation flux variations of different concentrations of nutmeg essential oil-in-water emulsion on (a) PAN and (b) H-PAN membranes.

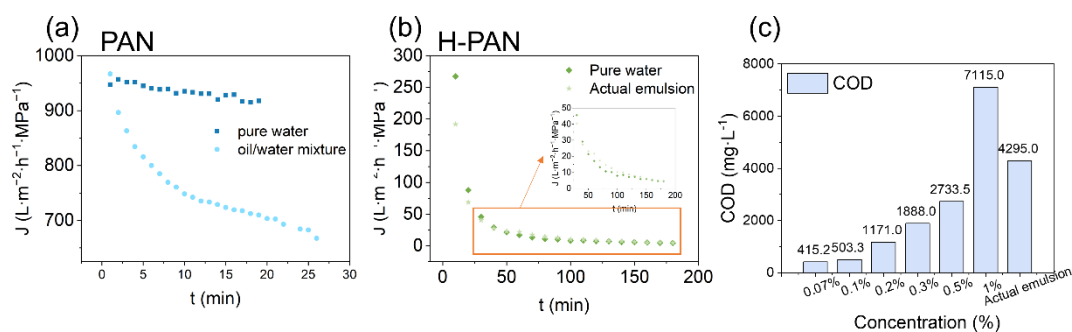

**Figure S4.** The permeation flux variations of water and nutmeg essential oil-in-water emulsions on (a) PAN and (b) H-PAN membranes; (c) The COD of different concentrations of nutmeg essential oil-in-water emulsions.

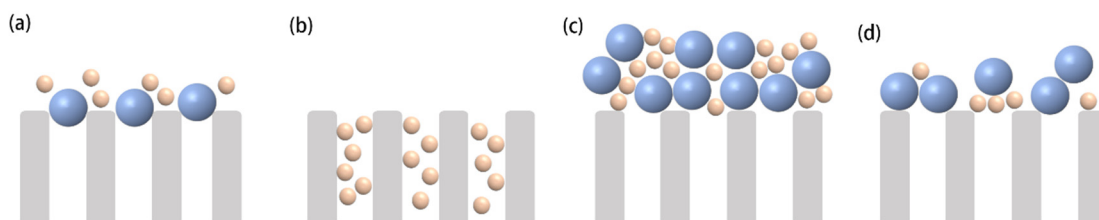

**Figure S5.** The schematic diagram of the Hermia model. (a) complete blocking model; (b) standard blocking model; (c) cake blocking model; (d) intermediate blocking model.

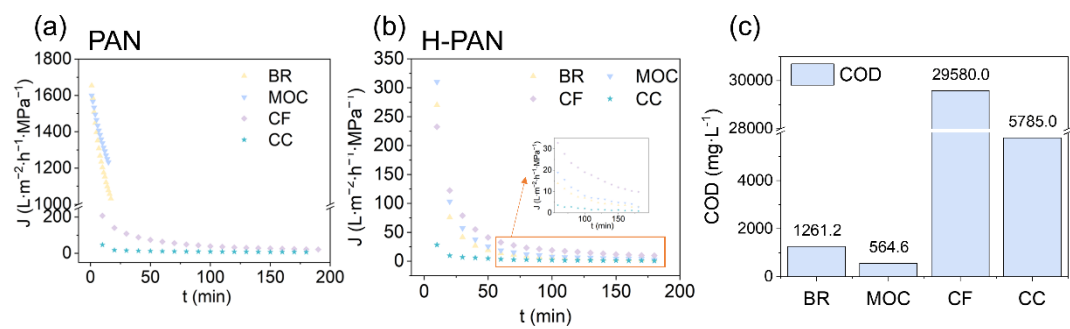

**Figure S6.** The permeation flux variations of BR, MOC, CF and CC essential oil-in-water emulsions on (a) PAN and (b) H-PAN membranes; (c) The COD of BR, MOC, CF and CC essential oil-in-water emulsions.
